# Supplementary material for: Ruthenium complexes featuring cooperative phosphine–pyridine–iminophosphorane (PNN) ligands: synthesis, reactivity and catalytic activity
Source: Royal Society of Chemistry journal article supplement (doi:10.1039/c8dt03488e), 2018-01-01
Supplement: c8dt03488e1.pdf [file c8dt03488e1.pdf]

Electronic supplementary information for:

**Ruthenium complexes featuring cooperative phosphine-pyridine-  
iminophosphorane (PNN) ligands: synthesis, reactivity and catalytic  
activity.**

Thibault Cheisson, Louis Mazaud, and Audrey Auffrant,\*

LCM, CNRS-Ecole polytechnique, Université Paris-Saclay, F-91128 Palaiseau Cedex

[audrey.auffrant@polytechnique.edu](mailto:audrey.auffrant@polytechnique.edu)

**Table of contents**

|                            |    |
|----------------------------|----|
| X-ray crystallography..... | S2 |
| NMR spectra.....           | S5 |

## I. X-Ray Crystallography

Table S1 : Crystallographic Data for  $[\mathbf{L}^{\text{Cy}}.\text{LiCl}]_2$ ,  $[\mathbf{L}^{\text{Cy}}.\text{LiCl}.\text{THF}]$ ,  $\mathbf{1}^{\text{Ph}}$

|                         | $[\mathbf{L}^{\text{Cy}}.\text{LiCl}]_2$                                | $\mathbf{L}^{\text{Cy}}.\text{LiCl}.\text{THF}$       | $\mathbf{1}^{\text{Ph}}$                                             |
|-------------------------|-------------------------------------------------------------------------|-------------------------------------------------------|----------------------------------------------------------------------|
| Formula                 | $\text{C}_{74}\text{H}_{100}\text{Cl}_2\text{Li}_2\text{N}_4\text{P}_4$ | $\text{C}_{41}\text{H}_{58}\text{ClLiN}_2\text{OP}_2$ | $\text{C}_{61}\text{H}_{53}\text{Cl}_2\text{N}_2\text{P}_3\text{Ru}$ |
| Mw                      | 1254.23                                                                 | 699.22                                                | 1078.93                                                              |
| Space group             | P 2 <sub>1</sub> /c                                                     | P -1                                                  | P2 <sub>1</sub> /c                                                   |
| V (Å <sup>3</sup> )     | 3484.4(4)                                                               | 3914.3(5)                                             | 5180.4(6)                                                            |
| a (Å)                   | 10.437(1)                                                               | 11.582(1)                                             | 18.448(1)                                                            |
| b (Å)                   | 16.826(1)                                                               | 15.915(1)                                             | 10.888(1)                                                            |
| c (Å)                   | 19.843(1)                                                               | 22.595(1)                                             | 26.346(1)                                                            |
| α (deg)                 | 90                                                                      | 109.675(1)                                            | 90.00                                                                |
| β (deg)                 | 90.720(1)                                                               | 92.224(1)                                             | 101.784(1)                                                           |
| γ (deg)                 | 90                                                                      | 91.818(1)                                             | 90.00                                                                |
| Z                       | 2                                                                       | 4                                                     | 4                                                                    |
| d (g.cm <sup>-3</sup> ) | 1.195                                                                   | 1.186                                                 | 1.383                                                                |
| F(000)                  | 1344                                                                    | 1504                                                  | 2544                                                                 |
| θ <sub>max</sub>        | 25.024                                                                  | 25.026                                                | 25.5615                                                              |
| Rflns measd             | 13874                                                                   | 44515                                                 | 42635                                                                |
| Unique data             | 6090                                                                    | 13690                                                 | 14755                                                                |
| R <sub>int</sub>        | 0.0937                                                                  | 0.0662                                                | 0.0589                                                               |
| wR2 <sup>[b]</sup>      | 0.1912                                                                  | 0.1729                                                | 0.1077                                                               |
| R1 <sup>[c]</sup>       | 0.0982                                                                  | 0.0680                                                | 0.0544                                                               |
| GoF <sup>[a]</sup>      | 1.135                                                                   | 1.060                                                 | 1.101                                                                |
| CCDC number             | 1864092                                                                 | 1864093                                               | 1864094                                                              |

For  $I > 2\sigma(I)$ : <sup>[a]</sup>  $R_1 = \sum |F_o| - |F_c| / \sum F_o$ . <sup>[b]</sup>  $wR_2 = [\sum [w(F_o^2 - F_c^2)^2] / \sum [w(F_o^2)^2]]^{1/2}$ . <sup>[c]</sup> Goodness-of-fit  $[\sum [w(F_o^2 - F_c^2)^2] / (N_{\text{obs}} - N_{\text{params}})]^{1/2}$ .

Table S2 : Crystallographic Data for **1<sup>Cy</sup>**, **2<sup>Cy</sup>**, **4**

|                         | <b>1<sup>Cy</sup></b>                                                            | <b>2<sup>Cy</sup></b>                                              | <b>4</b>                                                                                                |
|-------------------------|----------------------------------------------------------------------------------|--------------------------------------------------------------------|---------------------------------------------------------------------------------------------------------|
| Formula                 | C <sub>55</sub> H <sub>65</sub> Cl <sub>2</sub> N <sub>2</sub> P <sub>3</sub> Ru | C <sub>55</sub> H <sub>64</sub> ClN <sub>2</sub> P <sub>3</sub> Ru | C <sub>55</sub> H <sub>46</sub> ClN <sub>2</sub> P <sub>3</sub> Ru, 1.5(C <sub>6</sub> H <sub>6</sub> ) |
| Mw                      | 1018.97                                                                          | 982.51                                                             | 1081.53                                                                                                 |
| Space group             | P -1                                                                             | P 2 <sub>1</sub> /c                                                | P2 <sub>1</sub> /c                                                                                      |
| V (Å <sup>3</sup> )     | 2968.5(4)                                                                        | 6018.9(2)                                                          | 5299.4(5)                                                                                               |
| a (Å)                   | 11.854(1)                                                                        | 12.164(1)                                                          | 15.919(1)                                                                                               |
| b (Å)                   | 14.926(1)                                                                        | 30.321(1)                                                          | 14.857(1)                                                                                               |
| c (Å)                   | 19.142(1)                                                                        | 16.583(1)                                                          | 23.059(1)                                                                                               |
| α (deg)                 | 69.988(1)                                                                        | 90                                                                 | 90                                                                                                      |
| β (deg)                 | 82.727(1)                                                                        | 100.227(1)                                                         | 103.659(1)                                                                                              |
| γ (deg)                 | 68.875(1)                                                                        | 90                                                                 | 90                                                                                                      |
| Z                       | 2                                                                                | 4                                                                  | 4                                                                                                       |
| d (g.cm <sup>-3</sup> ) | 1.140                                                                            | 1.084                                                              | 1.356                                                                                                   |
| F(000)                  | 1064                                                                             | 2056                                                               | 2236                                                                                                    |
| θ <sub>max</sub>        | 27.482                                                                           | 25.025                                                             | 27.483                                                                                                  |
| Rflns measd             | 41532                                                                            | 60406                                                              | 38001                                                                                                   |
| Unique data             | 13490                                                                            | 10375                                                              | 12040                                                                                                   |
| R <sub>int</sub>        | 0.0595                                                                           | 0.0343                                                             | 0.0550                                                                                                  |
| wR2 <sup>[b]</sup>      | 0.1009                                                                           | 0.1222                                                             | 0.0927                                                                                                  |
| R1 <sup>[c]</sup>       | 0.0505                                                                           | 0.0619                                                             | 0.0488                                                                                                  |
| GoF <sup>[a]</sup>      | 1.080                                                                            | 1.136                                                              | 1.056                                                                                                   |
| CCDC number             | 1864095                                                                          | 1864096                                                            | 1864097                                                                                                 |

For  $I > 2\sigma(I)$ : <sup>[a]</sup>  $R_1 = \sum |F_o| - |F_c| / \sum F_o$ , <sup>[b]</sup>  $wR_2 = [\sum [w(F_o^2 - F_c^2)^2] / \sum [w(F_o^2)^2]]^{1/2}$ , <sup>[c]</sup> Goodness-of-fit  $[\sum [w(F_o^2 - F_c^2)^2] / (N_{obs} - N_{params})]^{1/2}$ .

Table S3 : Crystallographic Data for **3<sup>Cy</sup>**.

| <b>3<sup>Cy</sup></b>   |                                                                    |
|-------------------------|--------------------------------------------------------------------|
| Formula                 | C <sub>55</sub> H <sub>66</sub> ClN <sub>2</sub> P <sub>3</sub> Ru |
| Mw                      | 984.52                                                             |
| Space group             | P 2 <sub>1</sub> /n                                                |
| V (Å <sup>3</sup> )     | 10195.6(3)                                                         |
| a (Å)                   | 25.7223(5)                                                         |
| b (Å)                   | 12.2413(2)                                                         |
| c (Å)                   | 32.4835(6)                                                         |
| α (deg)                 | 90                                                                 |
| β (deg)                 | 94.5770(5)                                                         |
| γ (deg)                 | 90                                                                 |
| Z                       | 8                                                                  |
| d (g.cm <sup>-3</sup> ) | 1.283                                                              |
| F(000)                  | 4128                                                               |
| θ <sub>max</sub>        | 27.482                                                             |
| RfIns measd             | 62437                                                              |
| Unique data             | 22790                                                              |
| wR2 <sup>[b]</sup>      | 0.0427                                                             |
| R1 <sup>[c]</sup>       | 0.1587                                                             |
| GoF <sup>[a]</sup>      | 0.0656                                                             |
| GoF                     | 1.183                                                              |
| CCDC number             | 1864098                                                            |

For  $I > 2\sigma(I)$ : <sup>[a]</sup>  $R_1 = \sum |F_o| - |F_c| / \sum F_o$ , <sup>[b]</sup>  $wR_2 = [\sum [w(F_o^2 - F_c^2)^2] / \sum [w(F_o^2)^2]]^{1/2}$ , <sup>[c]</sup> Goodness-of-fit  $[\sum [w(F_o^2 - F_c^2)^2] / (N_{obs} - N_{params})]^{1/2}$ .

## II. NMR spectra

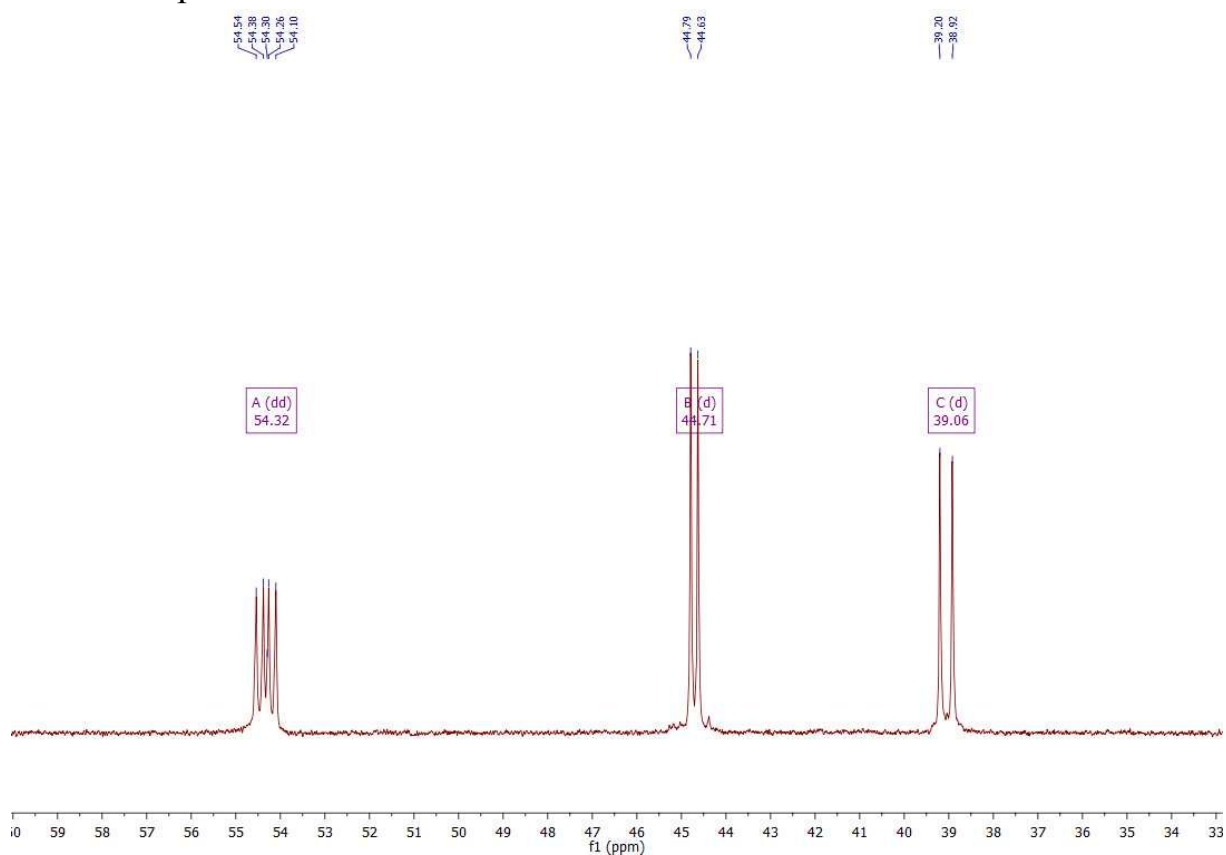

Figure S1:  $^{31}\text{P}\{^1\text{H}\}$  NMR spectrum of  $1^{\text{Ph}}$  in benzene.

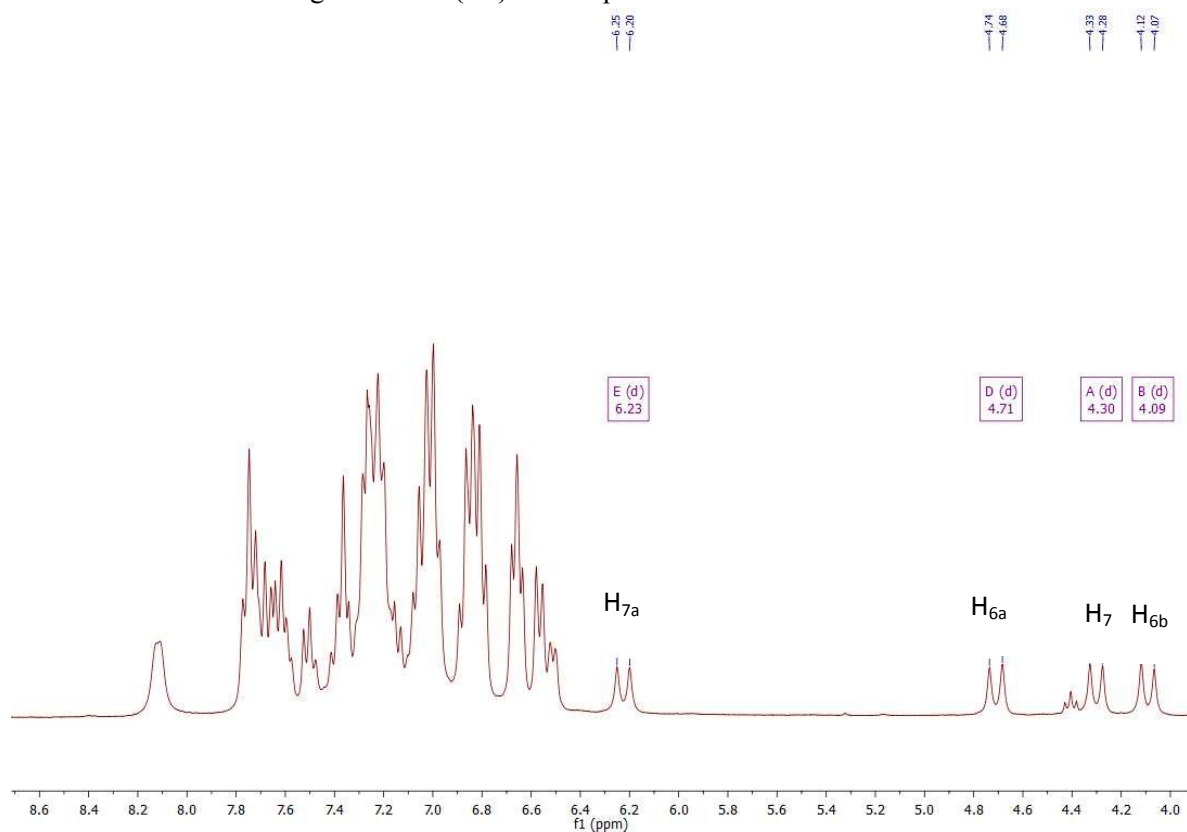

Figure S2:  $^1\text{H}\{^{31}\text{P}\}$  NMR spectrum of  $1^{\text{Ph}}$  in  $\text{CDCl}_3$  at  $-60^\circ\text{C}$ .

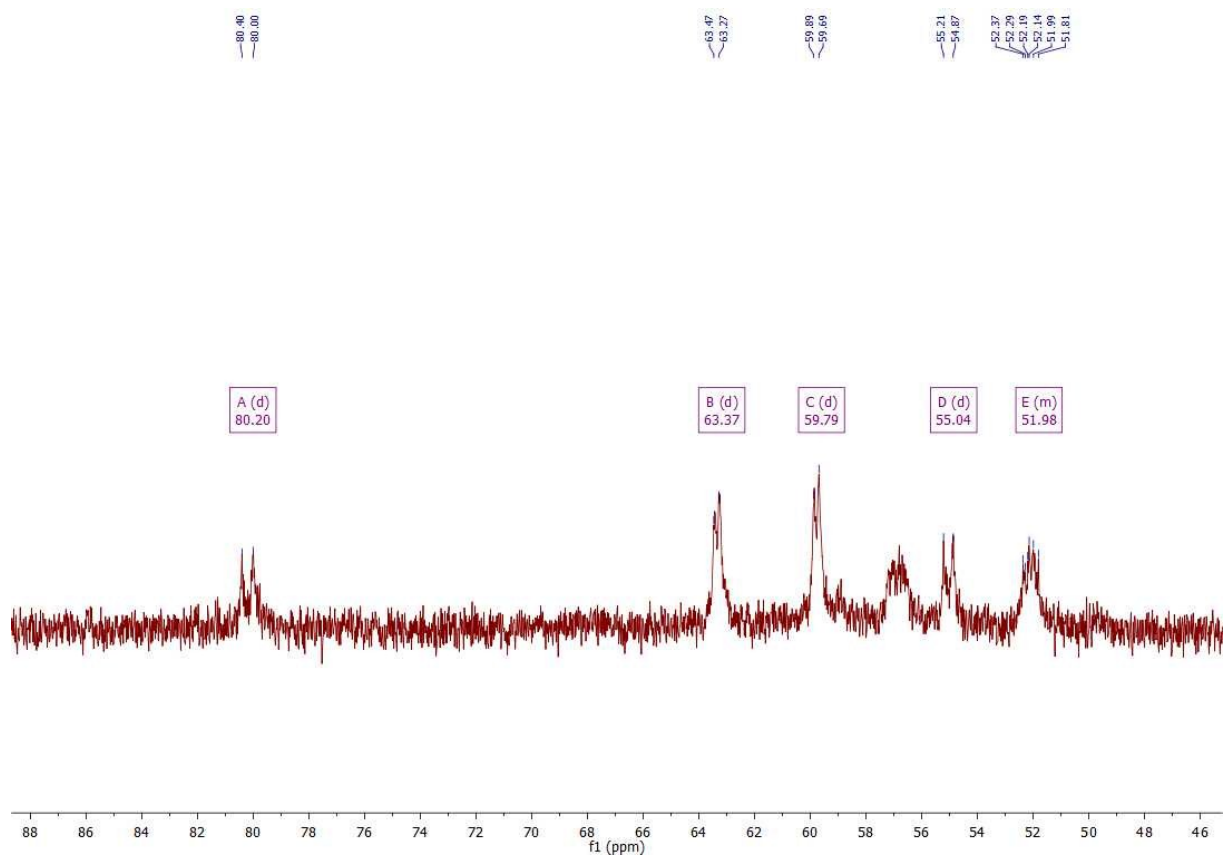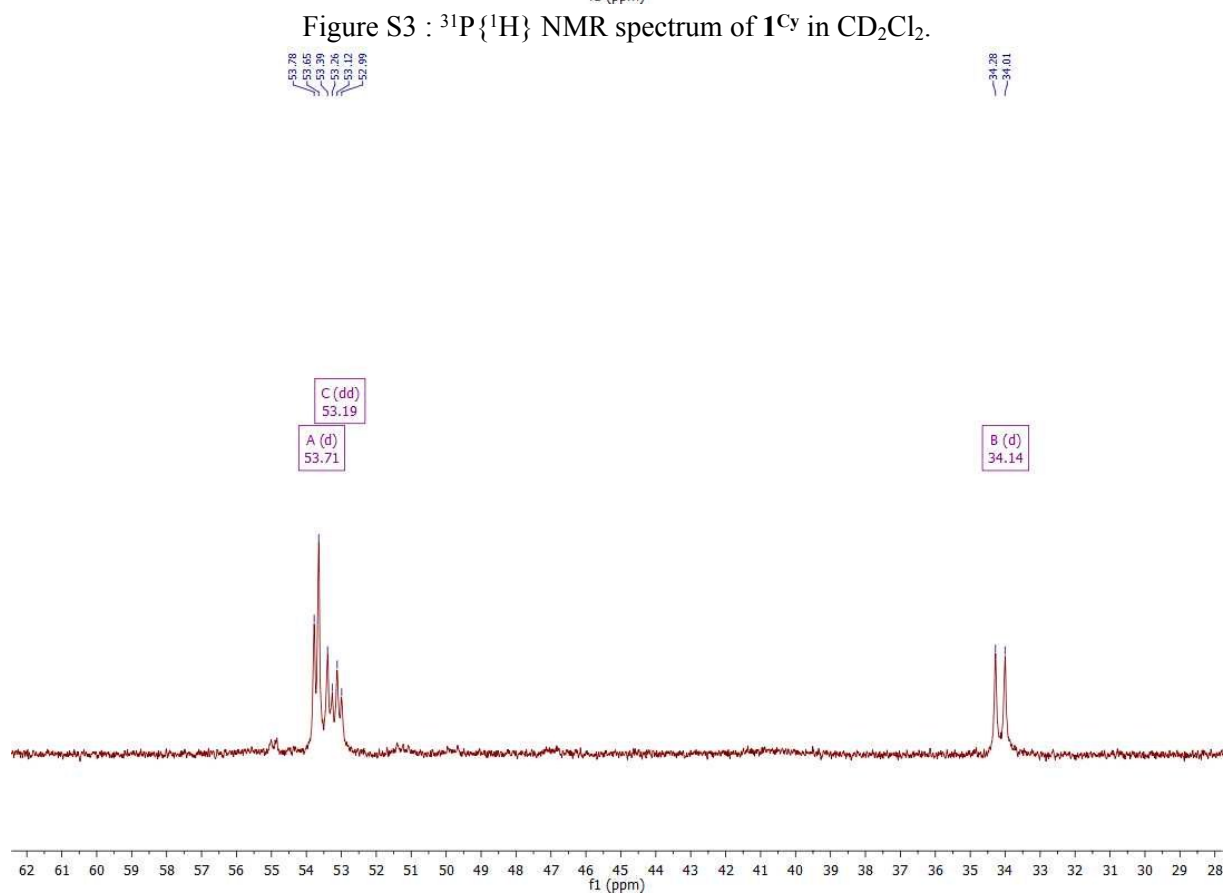

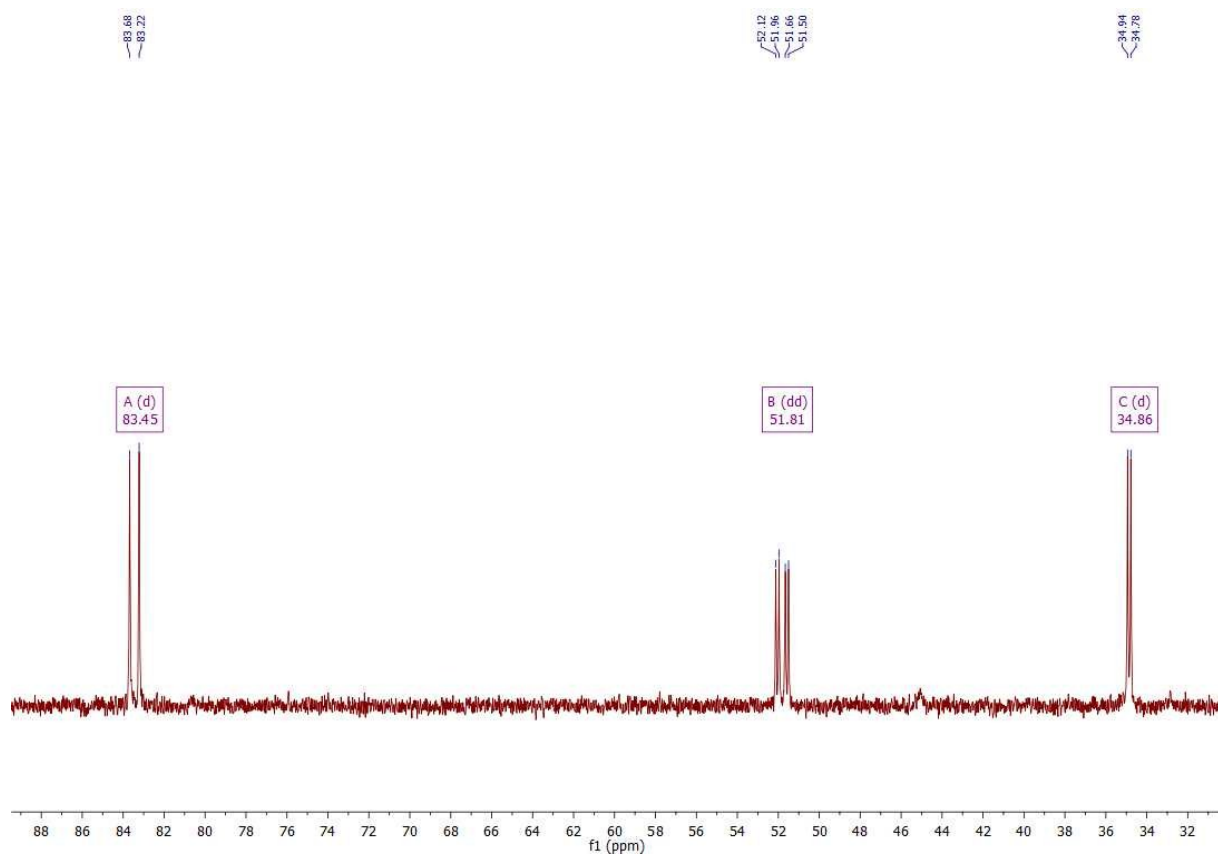

Figure S5:  $^{31}\text{P}\{^1\text{H}\}$  NMR spectrum of  $2^{\text{Ph}}$  in benzene.

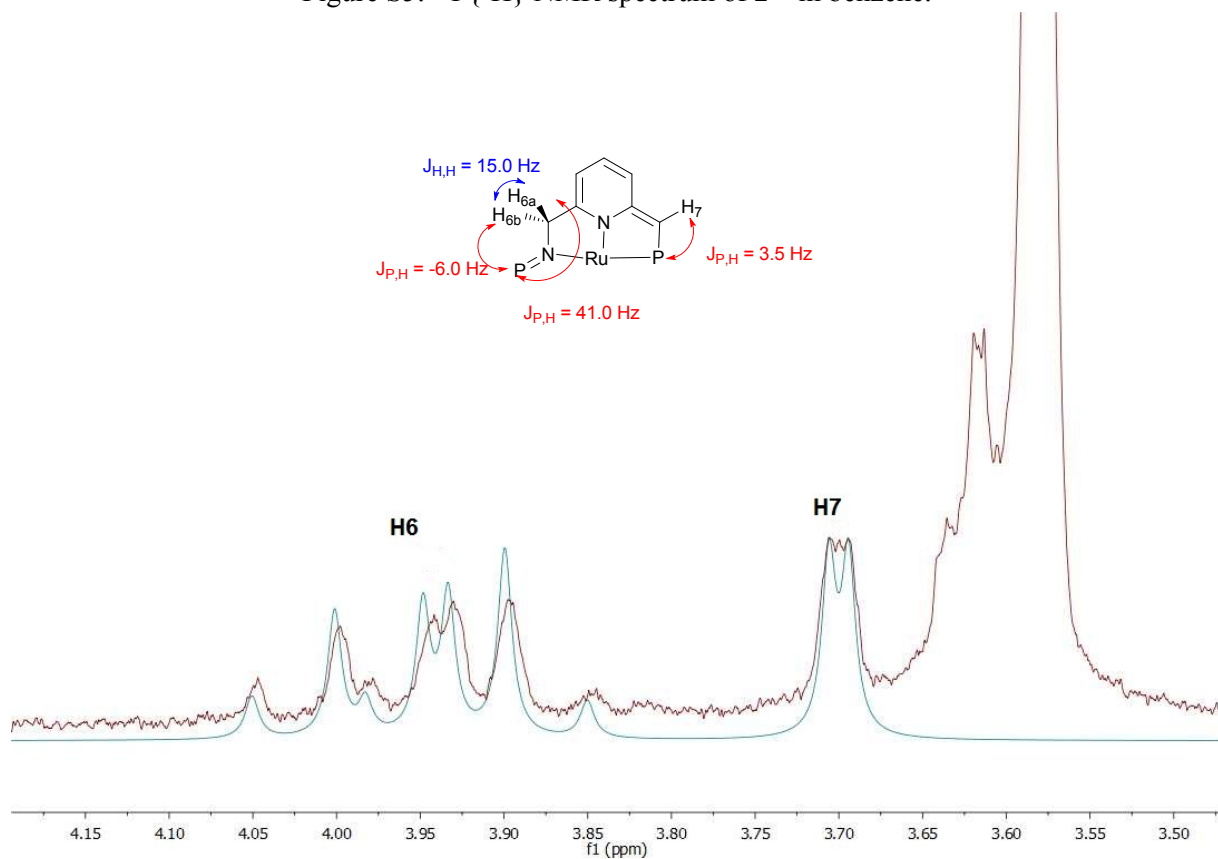

Figure S6: Overlay of experimental (brown) and simulated (teal)  $^1\text{H}$  NMR spectrum of  $2^{\text{Ph}}$  in  $\text{THF-}d_8$  (centered on the benzylic proton region). Coupling constants used to simulate the ABX pattern of H6 are indicated in the inset,  $\delta_{\text{H6a}} = 3.94$  and  $\delta_{\text{H6a}} = 3.95$  ppm.

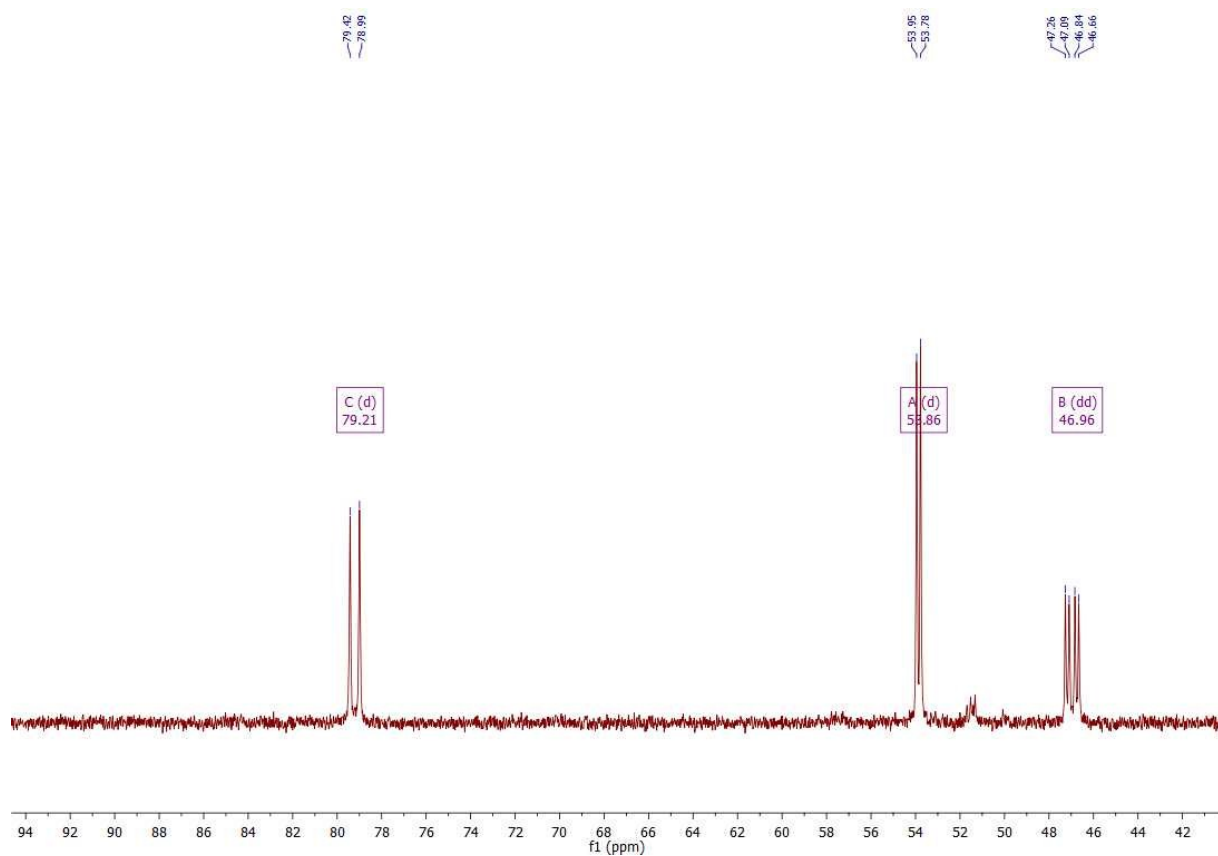

Figure S7:  $^{31}\text{P}\{^1\text{H}\}$  NMR spectrum of  $2^{\text{Cy}}$  in benzene

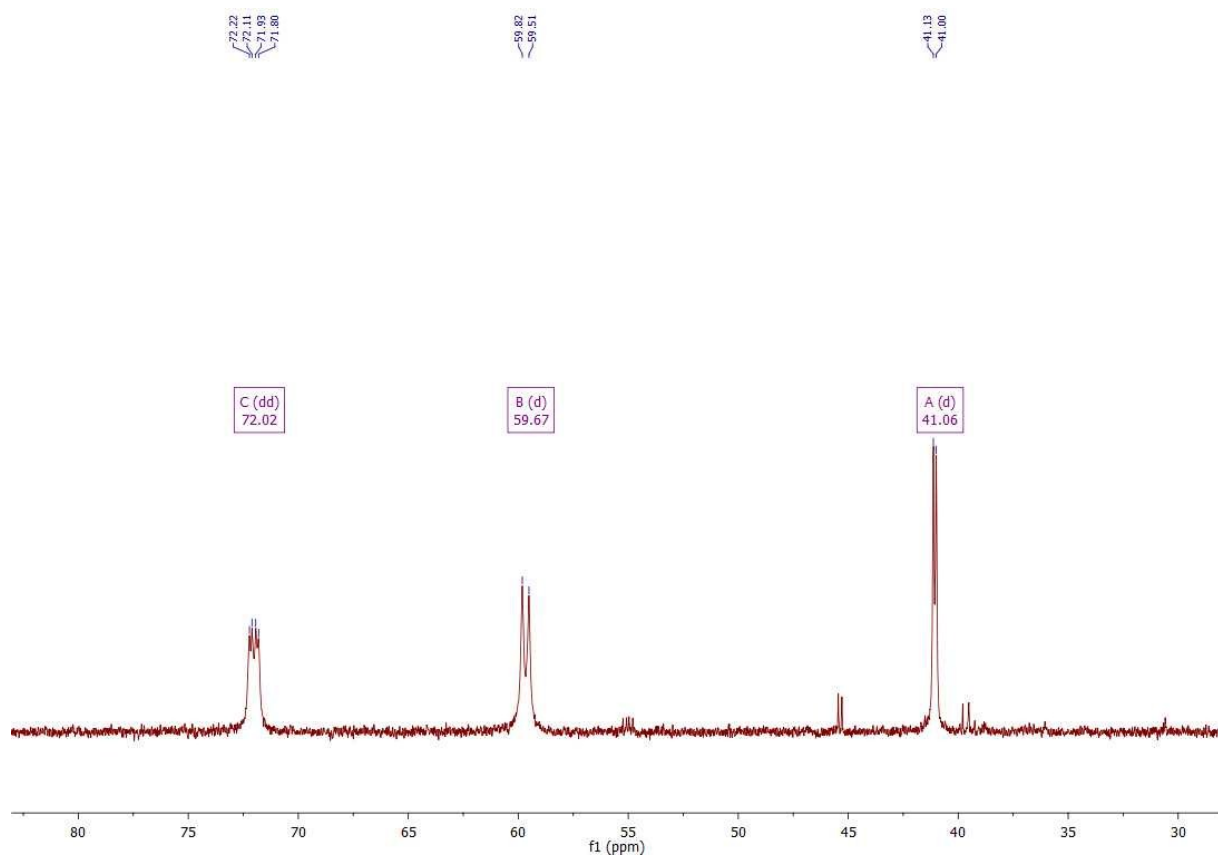

Figure S8: In-situ  $^{31}\text{P}\{^1\text{H}\}$  NMR spectrum of  $3^{\text{Ph}}$  in benzene.



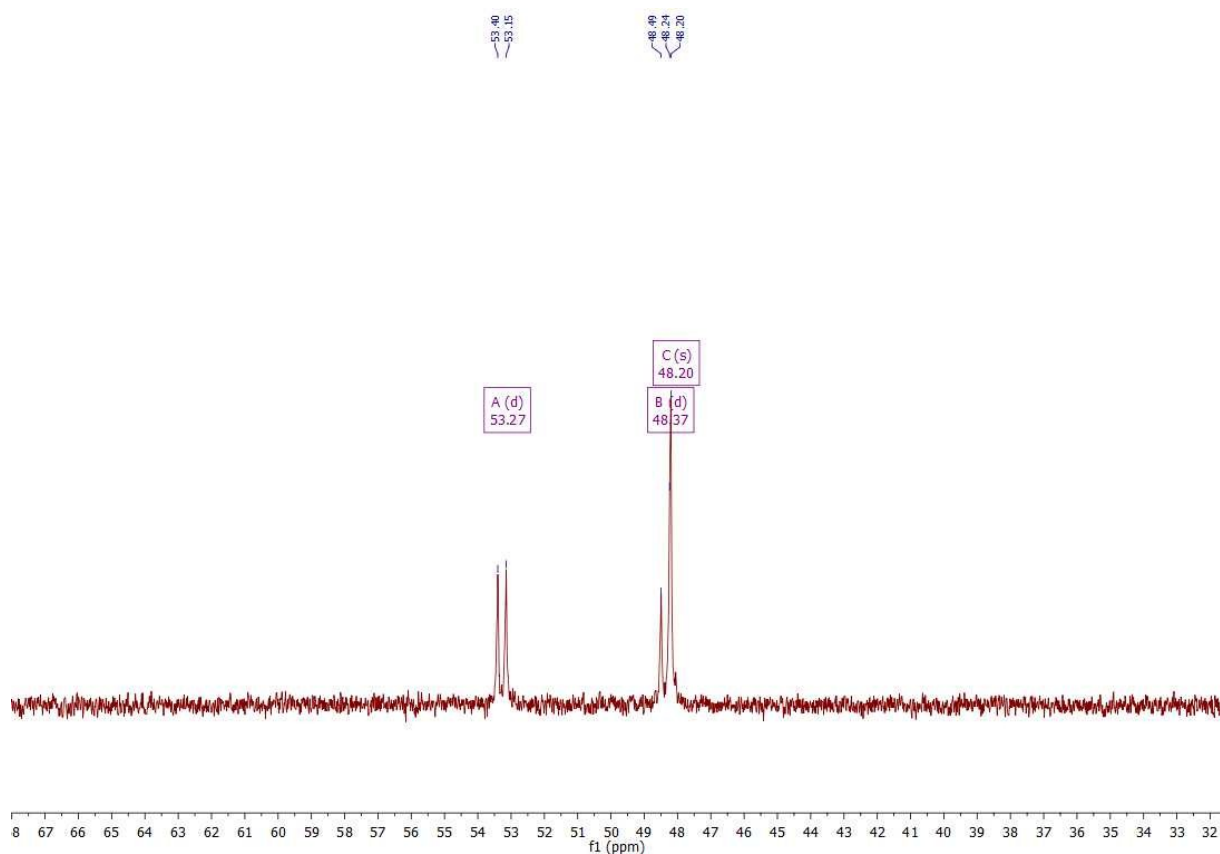

Figure S9:  $^{31}\text{P}\{^1\text{H}\}$  NMR spectrum of **4** in toluene- $d_8$ .

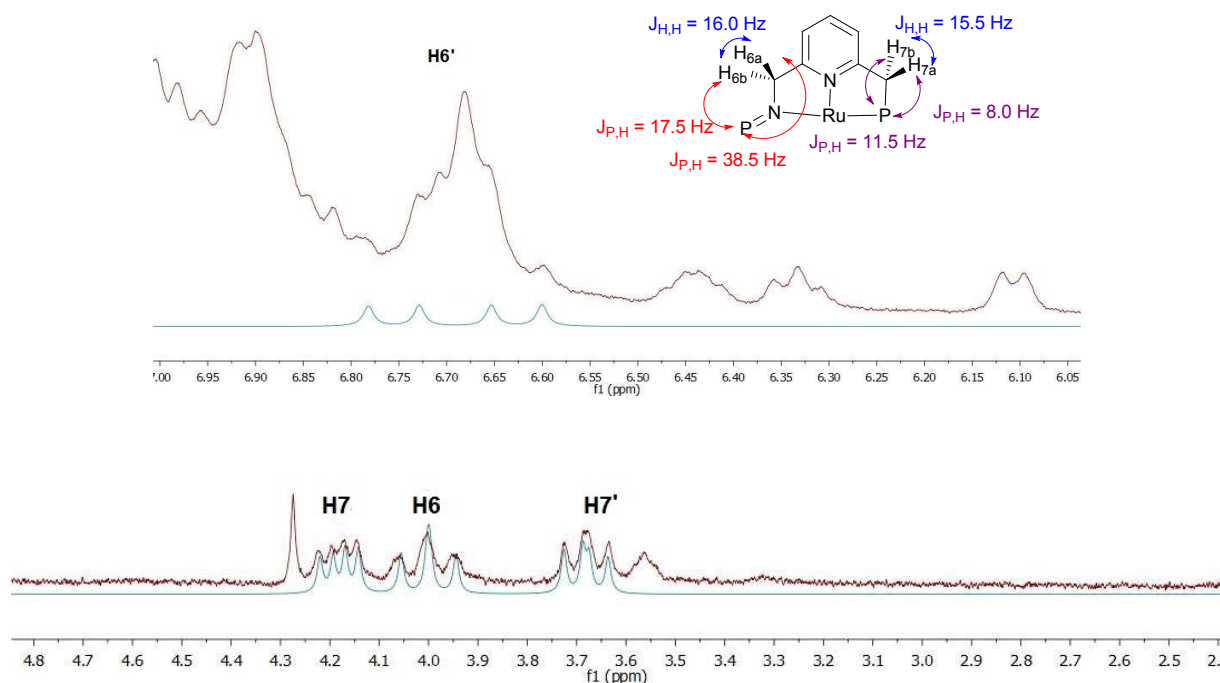

Figure S10: Overlay of experimental (brown) and simulated (teal)  $^1\text{H}$  NMR spectrum of **4** in  $\text{C}_6\text{D}_6$ . Coupling constants used to simulate the AMX patterns of  $\text{H}_6$  and  $\text{H}_7$  are indicated in the inset.

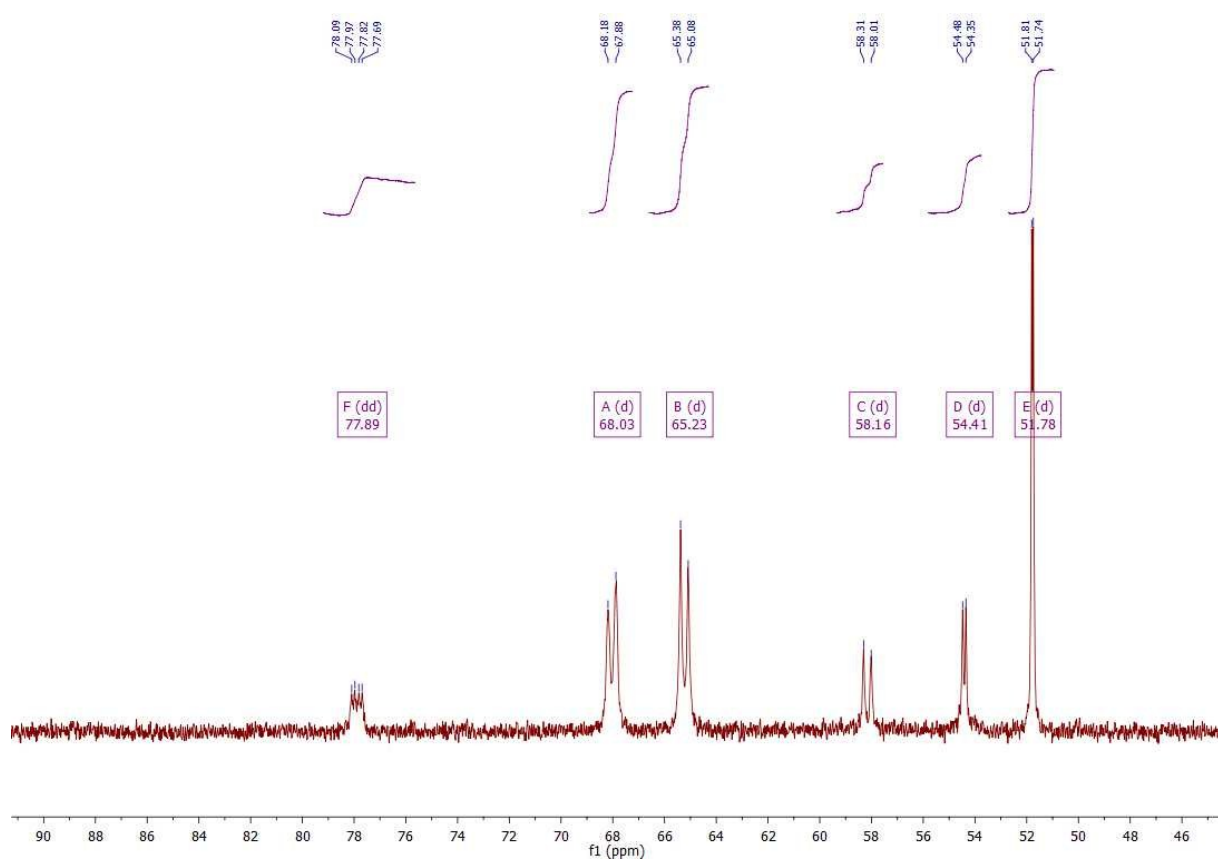

Figure S11:  $^{31}\text{P}\{^1\text{H}\}$  NMR spectrum of  $3^{\text{Cy}}$  in  $\text{THF-}d_8$ .

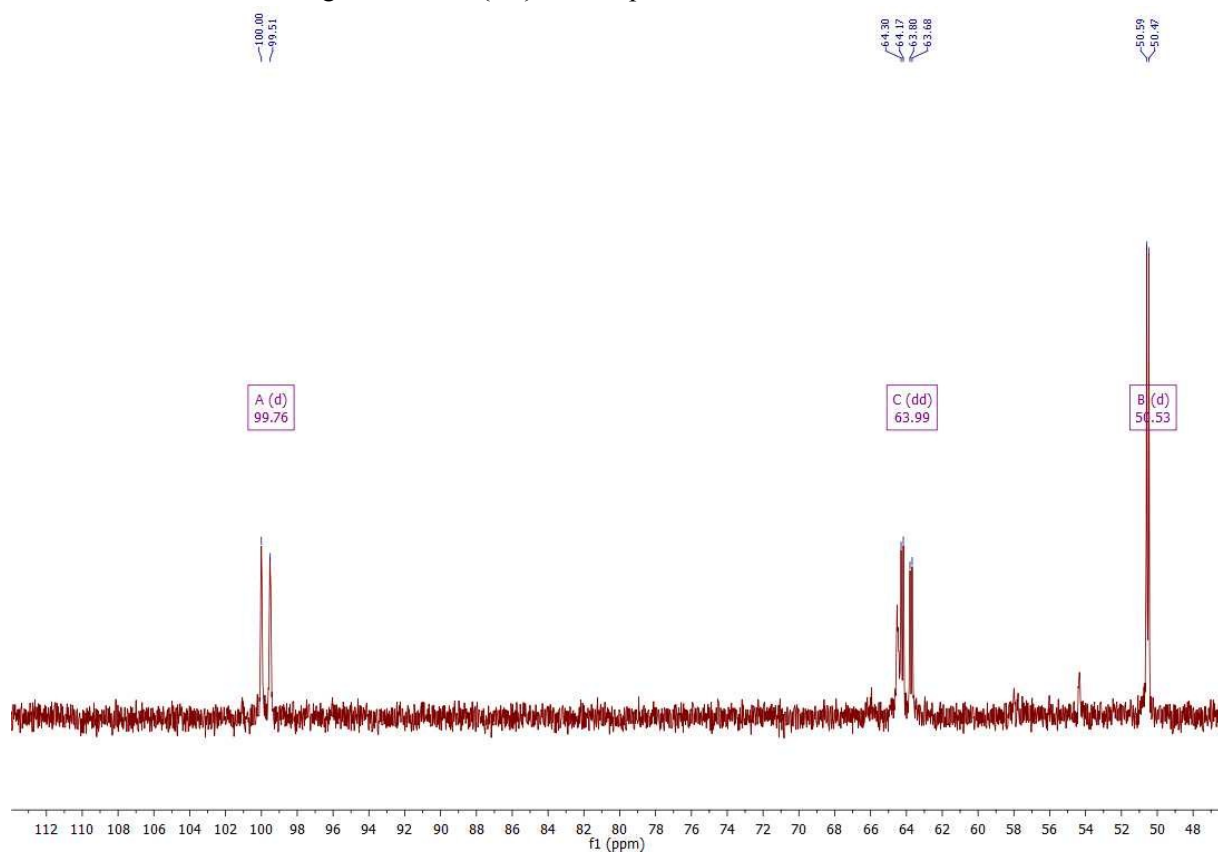

Figure S12:  $^{31}\text{P}\{^1\text{H}\}$  NMR spectrum of  $5$  in  $\text{THF-}d_8$ .

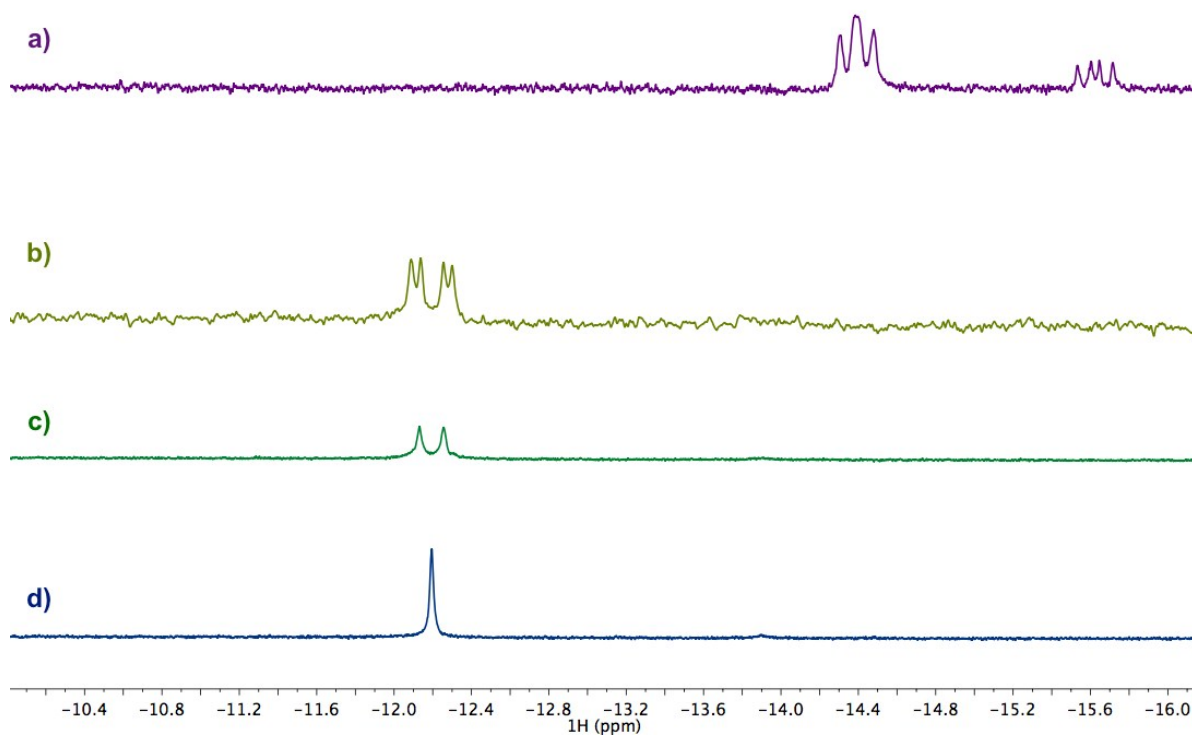

Figure S13: <sup>1</sup>H NMR (in THF-*d*<sub>8</sub>) hydride resonances of: a) **3**<sup>Cy</sup> (2 isomers); b) **5** (no <sup>31</sup>P decoupling); c) **5** (with <sup>31</sup>P decoupling at 100 ppm); d) **5** (full <sup>31</sup>P decoupling).
